# Supplementary material
Source: HighWire-hosted journal article supplement (https://jpet.aspetjournals.org/highwire/filestream/149928/field_highwire_adjunct_files/0/709SuppData.pdf)
Supplement: 709SuppData.pdf [file 709SuppData.pdf]

JPET-AR-2021-000709

**Supplemental material and data**

**Article title:**

Potentiation of muscarinic M<sub>3</sub> receptor activation through a new allosteric site with a novel positive allosteric modulator ASP8302

**Authors:**

Risa Okimoto, Katsutoshi Ino, Kenichiro Ishizu, Hajime Takamatsu, Kazuyuki Sakamoto, Hironori Yuyama, Hideyoshi Fuji, Akiyoshi Someya, Akiyoshi Ohtake, Takao Ishigami, Noriyuki Masuda, Masahiro Takeda, Shunichi Kajioka, Naoki Yoshimura

**Journal title:**

Journal of Pharmacology and Experimental Therapeutics

**Supplemental material**

Primers for constructions of cells expressing of human muscarinic M<sub>1</sub>, M<sub>2</sub>, M<sub>3</sub>, M<sub>4</sub> and M<sub>5</sub> receptors are as follows:

Human muscarinic M<sub>1</sub> receptors

Forward primer: GTGGGATCCATGAACACTTCAGCCCCACCTGC

Reverse primer: CACGCGGCCGCCTATCAGCATTGGCGGGAGG

Human muscarinic M<sub>2</sub> receptors

Forward primer: CCACCATGAATAACTCAACAAACTCCTCTAAC

Reverse primer: GATATTTTACCTTG TAGCGCCTATG

Human muscarinic M<sub>3</sub> receptors

Forward primer: TCACAATGACCTTGCACAATAACAG

Reverse primer: GATACAACCTCATTCTACAAGGCC

Human muscarinic M<sub>4</sub> receptors

Forward primer: CTCGCGGCCGCATGGCCA ACTTCACACCTGTCAA

Reverse primer: CTCGGATCCCCTACCTGGCAGTGCCGATGTTCCG

Human muscarinic M<sub>5</sub> receptors

Forward primer: CTCGCGGCCGCATGGAAGGGGATTCTTACC

Reverse primer: CTCGGATCCTCAGGGTAGCTTGCTGTTCC

**Supplemental Table 1.** Methods, PCR templates and primers used for the construction of plasmids expressing receptor mutants

| Chimeric receptor                    | Methods                                                                               | 1st PCR    |         |                 |            |         |            | 2nd PCR    |         |         |    |
|--------------------------------------|---------------------------------------------------------------------------------------|------------|---------|-----------------|------------|---------|------------|------------|---------|---------|----|
|                                      |                                                                                       | Fragment 1 |         |                 | Fragment 2 |         |            | Templates  |         | Primers |    |
|                                      |                                                                                       | Templates  | Primers |                 | Templates  | Primers |            | Templates  | Primers |         |    |
| M3_TM2_M1<br>M3_TM4_M1               | Inverse PCR-based site-directed mutagenesis,<br>Mega primer polymerase chain reaction | pcDNA hM3  | P1      | <u>P2</u><br>P3 | NA         | NA      | pcDNA hM1  | Fragment 1 | P4      |         |    |
| M3_TM5_M1<br>M1_TM5_M3               | PCR-based single-site mutagenesis                                                     | pcDNA hM3  | P5      | P6              | pcDNA hM1  | P7 P8   | Fragment 1 | Fragment 2 | P5      | P8      |    |
| M3_TM4_M1_TM5_M3<br>M1_TM4_M3_TM5_M1 | Inverse PCR-based site-directed mutagenesis                                           | pcDNA hM1  | P9      | P10             | pcDNA hM3  | P11 P12 | Fragment 1 | Fragment 2 | P9      | P12     |    |
|                                      |                                                                                       | pcDNA hM3  | P13     | P14             | NA         | NA      | NA         | NA         | NA      | NA      | NA |
|                                      |                                                                                       | pcDNA hM1  | P15     | P16             |            |         |            |            |         |         |    |

M1: muscarinic M<sub>1</sub> receptor; M3: muscarinic M<sub>3</sub> receptor; hM1: human muscarinic M<sub>1</sub> receptor, hM3: human muscarinic M<sub>3</sub> receptor, TM: transmembrane, NA: not applicable.

The primers used were as follows:

- P1 TTTACAATGACCTTGCACAATAAC
- P2 GATGAGGTCAGCACAGGCCAGGCTTAAGAGGAAGTAGTTGTTG
- P3 GCCAGAAGAGGATGGCTGGAGCCCAAAGGACAAAGGAGATG
- P4 CTTAAGTTTAAACGCTAGCCAGC
- P5 ATACAGAATTCGTCACCATGACCTTGCACAATAACAGTAC
- P6 CGTGCACATAATGGTGACAGGCATATAAAAAGC
- P7 GCCTGTCACCATTATGTGCACGCTCTACTGG
- P8 TCCTCGGATCCCTATCAGCATTGGCGGGAGGG
- P9 TCGGGGAATTCGCCACCATGAACACTTCAGCCC
- P10 GTCATGACTGTGACAGGGAGGTAGAAG
- P11 CCTCCCTGTCACAGTCATGACTATTTTATACTGGAGGATC
- P12 CTATGGGATCCATTCTACAAGGCCTGCTCGGGTG
- P13 CAGTGCTACATTCAGTTCCTCAGTGAGCCC

JPET-AR-2021-000709

P14 CCCAGCTAGCACAGTTCTCTTTCCAACAAAG

P15 GAGTGCTTCATCCAGTTCCTCTCCCAGCC

P16 TCCCGGAGGCACTGTCCGCTCCCCTACC

M3\_TM2\_M1 and M3\_TM4\_M1 were constructed by inverse PCR-based site-directed mutagenesis and mega primer polymerase chain reaction (Rajiv et al., 2004). N-terminal M<sub>3</sub> receptor sequences were amplified by PCR and purified by agarose gel electrophoresis (shown as 1<sup>st</sup> PCR in Table 1). Using this fragment as a mega primer, inverse PCR was conducted (shown as 2<sup>nd</sup> PCR in Table 1). Inverse PCR, digestion of the template plasmid by DpnI, and self-ligation of PCR products (Kinase/Ligase) were conducted using a KOD -Plus- Mutagenesis Kit (Toyobo) according to the manufacturer's instructions.

M3\_TM5\_M1 and M1\_TM5\_M3 were constructed by PCR-based single-site mutagenesis (Fanli et al., 2017). M<sub>1</sub> receptor and M<sub>3</sub> receptor sequences were amplified by PCR and purified by agarose gel electrophoresis (shown as 1<sup>st</sup> PCR in Table 1). Using this fragment as template, 2<sup>nd</sup> PCR was conducted. The PCR products were digested by EcoRI and BamHI, purified by agarose gel electrophoresis, and inserted into pcDNA 3.1 (-) EcoRI – BamHI sites.

M3\_ECL2\_M1 and M1\_ECL2\_M3 were constructed by inverse PCR-based site-directed mutagenesis (BioTechniques, 1997). Inverse PCR (shown as 1<sup>st</sup> PCR in Table 1), digestion of the template plasmid by DpnI, and self-ligation of PCR products (Kinase/Ligase) were conducted using a KOD -Plus- Mutagenesis Kit (Toyobo) according to the manufacturer's instructions.

Sequences of the mutant constructs were confirmed by DNA sequencing.

**Reference for**

Rajiv Tyagi, Richard Lai, Ronald G Duggleby (2004) A new approach to 'megaprimer' polymerase chain reaction mutagenesis without an intermediate gel purification step. *BMC Biotechnol.* 26;4:2.

Fanli Zeng, Yujie Zhang, Ze Zhang, Asrar Ahmad Malik, Yibin Lin (2017) Multiple-site fragment deletion, insertion and substitution mutagenesis by modified overlap extension PCR. *Biotechnology & Biotechnological Equipment* 31: 339-348

Modification of a PCRBased Site-Directed Mutagenesis Method (1997) Modification of a PCRBased Site-Directed Mutagenesis Method. *BioTechniques* 23:570-574

**Supplemental data**

**Supplemental Table 2.** Inhibitory effect of ASP8302 on radioligand binding to various receptors, ion channels and transporters

| Tested molecule                             | Inhibition (%) |                                           |
|---------------------------------------------|----------------|-------------------------------------------|
|                                             | ASP8302        | Positive substance                        |
| Adenosine A1 (Rat)                          | 13.40          | 99.87 (DPCPX)                             |
| $\alpha$ 1-Adrenergic (Non-selective) (Rat) | 13.93          | 99.41 (Prazosin)                          |
| $\alpha$ 2-Adrenergic (Non-selective) (Rat) | 26.90          | 99.92 (Yohimbine)                         |
| $\beta$ -Adrenergic (Non-selective) (Rat)   | 3.92           | 100.00 (( $\pm$ )-Propranolol)            |
| Angiotensin AT1 (Human)                     | 10.30          | 96.12 (Angiotensin II)                    |
| Angiotensin AT2 (Mouse)                     | 0.00           | 100.00 (Angiotensin II)                   |
| Bradykinin B2 (Human)                       | 6.11           | 98.98 (HOE140)                            |
| Ca Channel (Type L, Dihydropyridine) (Rat)  | 0.08           | 100.00 (Nitrendipine)                     |
| Ca Channel (Type N) (Rat)                   | 0.00           | 99.81 ( $\omega$ -Conotoxin GVIA)         |
| CCK A (Human)                               | 0.00           | 95.13 (CCK-8)                             |
| CCK B (Human)                               | 0.00           | 99.58 (CCK-8)                             |
| CRF1 (Human)                                | 5.88           | 99.90 (Urocortin human)                   |
| Dopamine D1 (Rat)                           | 1.67           | 99.46 (R(+)-SCH-23390)                    |
| Dopamine D2 Short (Human)                   | 0.00           | 100.00 ((+)-Butaclamol)                   |
| Dopamine Transporter (Human)                | 0.00           | 99.74 (GBR12909)                          |
| Estrogen (Rat)                              | 1.29           | 100.00 ( $\beta$ -Estradiol)              |
| Endothelin ETA (Human)                      | 0.00           | 97.21 (Endothelin-1)                      |
| Endothelin ETB (Human)                      | 9.01           | 97.89 (Endothelin-1)                      |
| GABA A (Agonist Site) (Rat)                 | 2.71           | 100.00 (Muscimol)                         |
| GABA A (BZ Central) (Rat)                   | 25.41          | 100.00 (Diazepam)                         |
| GABA B (Rat)                                | 1.16           | 100.00 (GABA)                             |
| Glutamate (AMPA) (Rat)                      | 4.73           | 100.00 ((S)-AMPA)                         |
| Glutamate (Kainate) (Rat)                   | 3.18           | 97.60 (Kainic acid)                       |
| Glutamate (NMDA Agonist Site) (Rat)         | 6.01           | 100.00 (L-Glutamic acid)                  |
| Glutamate (NMDA Glycine Site) (Rat)         | 0.00           | 98.72 (MDL105,519)                        |
| Glycine (Strychnine Sensitive) (Rat)        | 2.48           | 100.00 (Strychnine)                       |
| Histamine H1 (Central) (Guinea pig)         | 9.28           | 100.00 (Pyrilamine)                       |
| Histamine H2 (Rat)                          | 8.00           | 100.00 (Cimetidine)                       |
| Histamine H3 (Rat)                          | 13.26          | 99.81 ((R)(-)- $\alpha$ -Methylhistamine) |

ASP8302 concentration: 10  $\mu$ mol/L, Positive substance concentration: 1  $\mu$ mol/L for HOE140,

urocortin human and endothelin-1, or 10  $\mu$ mol/L for the others in supplemental table 2

Data are expressed as the mean values of duplicate samples.

The inhibition rate was calculated from “100 – binding ratio”.

$$\text{Binding ratio: } [(B - N)/(B_0 - N)] \times 100 (\%)$$

B: Bound radioactivity in the presence of test substance (individual value)

JPET-AR-2021-000709

B<sub>0</sub>: Total bound radioactivity in the absence of test substance (mean value)

N: Non-specific bound radioactivity (mean value)

DPCPX: dipropylcyclopentylxanthine; CCK: cholecystokinin; CRF: corticotropin-releasing factor; GABA: gamma-amino butyric acid; AMPA: alpha-amino-3-hydroxy-5-methyl-4-isoxazolepropionic acid; NMDA: N-methyl-D-aspartic acid

**Supplemental Table 3.** Inhibitory effect of ASP8302 on radioligand binding to various receptors, ion channels and transporters

| Tested molecule                      | Inhibition (%) |                                          |
|--------------------------------------|----------------|------------------------------------------|
|                                      | ASP8302        | Positive substance                       |
| K Channel KATP (Rat)                 | 1.84           | 100.00 (Glybenclamide)                   |
| K Channel SkCa (Rat)                 | 6.46           | 100.00 (Apamin)                          |
| Leukotriene B4 (Guinea pig)          | 0.00           | 100.00 (Leukotriene B <sub>4</sub> )     |
| Leukotriene D4 (Guinea pig)          | 0.00           | 100.00 (Leukotriene D <sub>4</sub> )     |
| Melatonin MT1 (Human)                | 1.50           | 100.00 (Melatonin)                       |
| Muscarinic (Non-selective) (Rat)     | 8.96           | 99.94 (Atropine)                         |
| Muscarinic M1 (Human)                | 19.65          | 100.00 (Atropine)                        |
| Muscarinic M2 (Human)                | 22.86          | 100.00 (Atropine)                        |
| Na Channel Site 2 (Rat)              | 23.41          | 99.56 (Dibucaine)                        |
| Neurokinin NK1 (Human)               | 19.89          | 100.00 (L-703,606)                       |
| Neurokinin NK2 (Human)               | 9.79           | 100.00 (Neurokinin A)                    |
| Neurokinin NK3 (Human)               | 0.00           | 100.00 (Senktide)                        |
| Norepinephrine Transporter (Human)   | 7.46           | 99.11 (Desipramine)                      |
| Nicotinic (Neuronal) (Rat)           | 0.00           | 99.73 ((±)-Nicotine)                     |
| Opiate (Non-selective) (Rat)         | 8.65           | 100.00 (Naloxone)                        |
| Opiate μ (Human)                     | 0.00           | 100.00 (DAMGO)                           |
| Oxytocin (Rat)                       | 0.00           | 99.71 (Oxytocin)                         |
| PAF (Rabbit)                         | 0.08           | 100.00 (PAF)                             |
| Serotonin 5HT1 (Non-selective) (Rat) | 7.80           | 95.94 (Serotonin)                        |
| Serotonin 5HT2B (Human)              | 10.05          | 97.07 (Serotonin)                        |
| Serotonin Transporter (Human)        | 7.88           | 100.00 (Imipramine)                      |
| Sigma (Non-selective) (Guinea pig)   | 27.42          | 100.00 (Haloperidol)                     |
| Testosterone (Human)                 | 14.15          | 100.00 (Testosterone)                    |
| Vasopressin V1 (Rat)                 | 5.54           | 100.00 ([Arg <sup>8</sup> ]-Vasopressin) |
| VIP 1 (Human)                        | 6.76           | 100.00 (VIP)                             |
| Muscarinic M3 (Human)                | 15.90          | 100.00 (Atropine)                        |
| Muscarinic M4 (Human)                | 9.27           | 99.95 (Atropine)                         |
| Muscarinic M5 (Human)                | 8.89           | 99.82 (Atropine)                         |

ASP8302 concentration: 10 μmol/L, Positive substance concentration: 1 μmol/L for

leukotriene B<sub>4</sub>, leukotriene D<sub>4</sub> and VIP, or 10 μmol/L for the others in supplemental table 3

Data are expressed as the mean values of duplicate samples.

The inhibition rate was calculated from “100 – binding ratio”.

$$\text{Binding ratio: } [(B - N)/(B_0 - N)] \times 100 (\%)$$

B: Bound radioactivity in the presence of test substance (individual value)

B<sub>0</sub>: Total bound radioactivity in the absence of test substance (mean value)



JPET-AR-2021-000709

N: Non-specific bound radioactivity (mean value)

DAMGO: [D-Ala<sup>2</sup>, N-MePhe<sup>4</sup>, Gly-ol<sup>5</sup>]enkephalin; KATP: ATP-sensitive potassium; SkCa: small conductance calcium-activated potassium; PAF: platelet activating factor; VIP: vasoactive intestinal peptide

**Supplemental Table 4.** Inhibitory effect of ASP8302 on various enzymes

| Tested enzyme                | Inhibition (%) |                    |
|------------------------------|----------------|--------------------|
|                              | ASP8302        | Positive substance |
| Acetylcholinesterase (Human) | 0.00           | 99.40 (Eserine)    |
| MAO-A (Rat)                  | 11.28          | 98.25 (Clorgyline) |
| MAO-B (Rat)                  | 8.09           | 93.41 (Ro 16-6491) |

ASP8302 concentration: 10  $\mu$ mol/L, Positive substance concentration: 100  $\mu$ mol/L for Ro 16-6491, or 10  $\mu$ mol/L for the others in supplemental table 4

Data are expressed as the mean values of duplicate samples.

The inhibition rate was calculated from “100 – reaction ratio”.

$$\text{Reaction ratio: } [(B - N)/(B_0 - N)] \times 100 (\%)$$

B: Radioactivity or fluorescence intensity in the tube or well for calculation of inhibition ratio (individual value)

B<sub>0</sub>: Radioactivity or fluorescence intensity of the tube or well for calculation of total reaction (mean value)

N: Radioactivity or fluorescence intensity of the tube or well for calculation of non-specific reaction (mean value)

MAO: monoamine oxidase
